# Supplementary material for: Structural and functional diversity among Type III restriction-modification systems that confer host DNA protection via methylation of the N4 atom of cytosine
Source: PubMed Central journal article supplement (PMC8259958; doi:10.1371/journal.pone.0253267), 2021-07-06
Supplement: pone.0253267.s002.pdf [file pone.0253267.s002.pdf]

# Raw gel image for Fig 4. Eco86II endonuclease mapping on pUC19 DNA

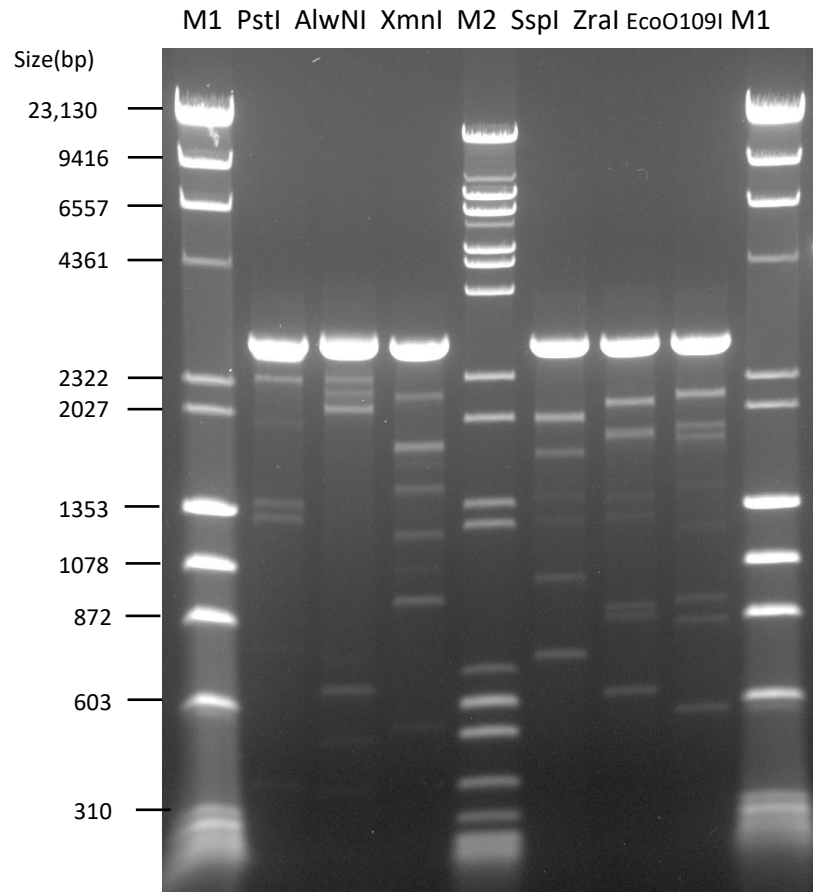

M1: lambda-HindIII and PhiX174-HaeIII digests.  
M2: lambda-BstEII and pBR322-MspI digests.

DNA fragments were visualized using ethidium bromide staining and a UV transilluminator.
